# Supplementary material
Source: PubMed Central journal article supplement (PMC3367526)
Supplement: cr201234x1.pdf [file cr201234x1.pdf]

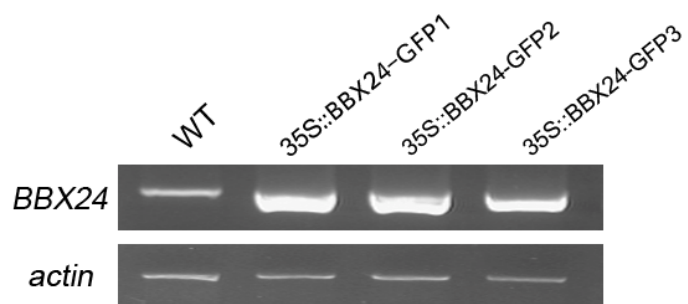

**Supplementary Information, Figure S1** Reverse-transcriptional (RT)-PCR analysis of *BBX24* expression in 35S::BBX24-GFP transgenic lines and their wild type plants (WT).
