# Supplementary material
Source: PubMed Central journal article supplement (PMC3367526)
Supplement: cr201234x2.pdf [file cr201234x2.pdf]

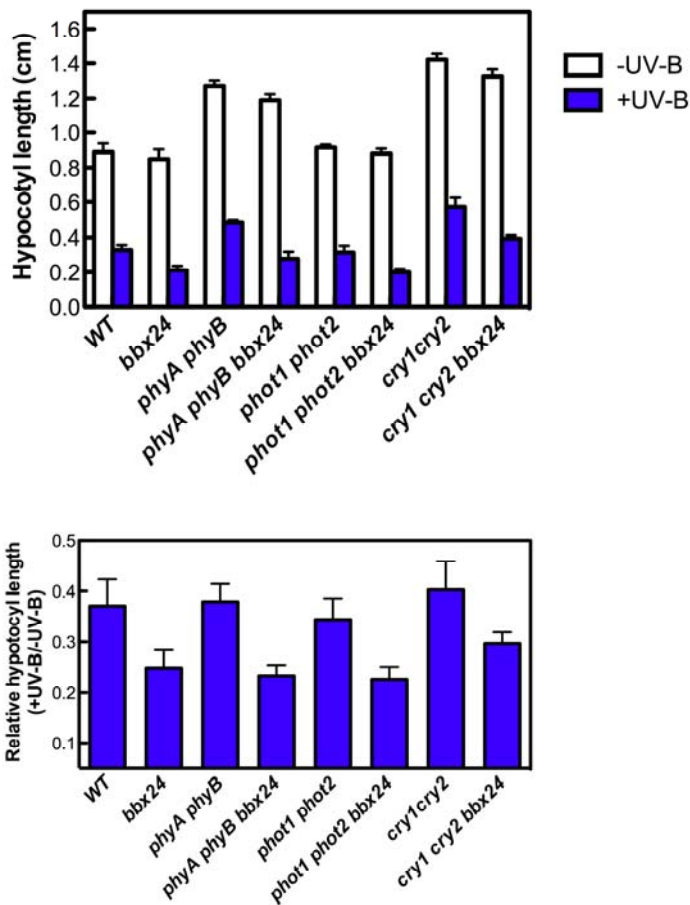

**Supplementary Information, Figure S2** The UV-B-induced short hypocotyl phenotype is independent of known photoreceptors.

Five-day-old seedlings were grown under continuous light ( $10 \mu\text{mol m}^{-2} \text{s}^{-1}$ ) supplemented with UV-B under a cellulose diacetate cutoff filter (+ UV-B) or Mylar cutoff filter (- UV-B). Hypocotyl length of various mutants was measured with the ImageJ software (upper panel). Relative hypocotyl length was given to show the UV-B responses of different genotypes (lower panel). Error bars represent the SEM of four independent replicates.
