# Supplementary material
Source: PubMed Central journal article supplement (PMC3367526)
Supplement: cr201234x3.pdf [file cr201234x3.pdf]

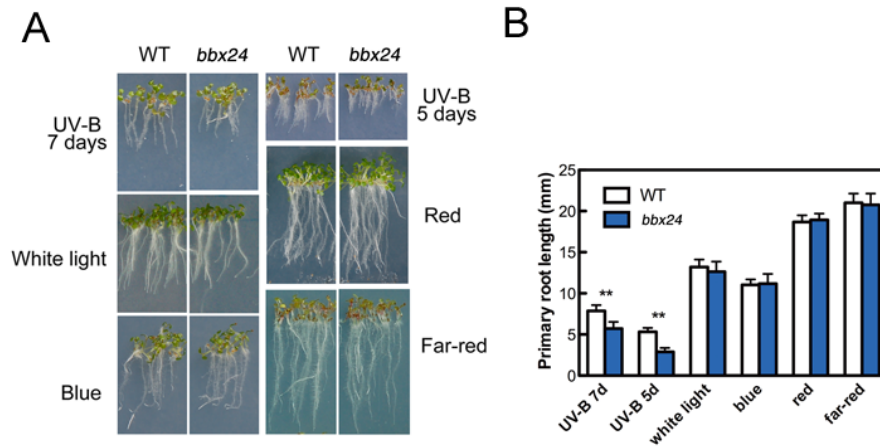

**Supplementary Information, Figure S3** Shorter primary root phenotype of *bbx24* under UV-B radiation.

Wild type and *bbx24* were grown under various light conditions for 7 d (light/dark, 16/8 h, unless indicated otherwise). Data shown are mean ( $\pm$ SEM) of four independent replications. Statistically significant difference of *bbx24* relative to its wild type was indicated by a double asterisk ( $P < 0.01$ ).
