# Supplementary material
Source: PubMed Central journal article supplement (PMC3367526)
Supplement: cr201234x4.pdf [file cr201234x4.pdf]

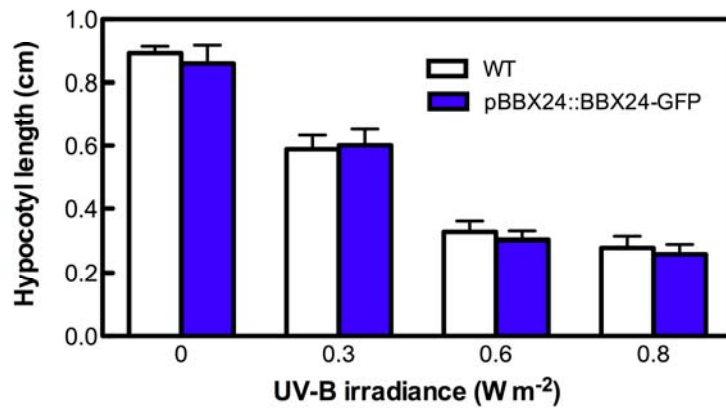

**Supplementary Information, Figure S4** Comparison of the UV-B responses of the pBBX24::BBX24-GFP transgenic plant with its wild type (WT).

Hypocotyl lengths of 5-day-old WT and the transgenic plants under various UV-B radiation levels were shown. Data shown are mean ( $\pm$ SEM) of three independent replications. No significant difference between the hypocotyl length of WT and that of the transgenic lines were found (Student's *t* test).
