# Supplementary material
Source: PubMed Central journal article supplement (PMC3367526)
Supplement: cr201234x5.pdf [file cr201234x5.pdf]

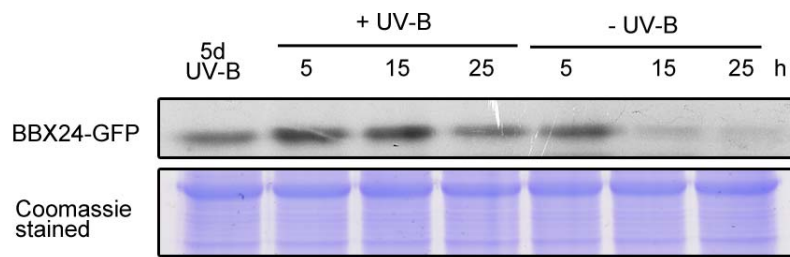

**Supplementary Information, Figure S5** BBX24 is degraded in the absence of UV-B radiation.

pBBX24::BBX24-GFP transgenic plants were grown under weak light ( $10 \mu\text{mol m}^{-2} \text{s}^{-1}$ ) supplemented with UV-B ( $0.6 \text{ W m}^{-2}$ ) for 5 d, then were either kept under UV-B or transferred to weak light for 25 h. BBX24-GFP accumulation was detected by protein immunoblotting by using an anti-GFP antibody. Total protein stained by Coomassie blue G-250 was used as the loading control.
