# Supplementary material
Source: PubMed Central journal article supplement (PMC3367526)
Supplement: cr201234x6.pdf [file cr201234x6.pdf]

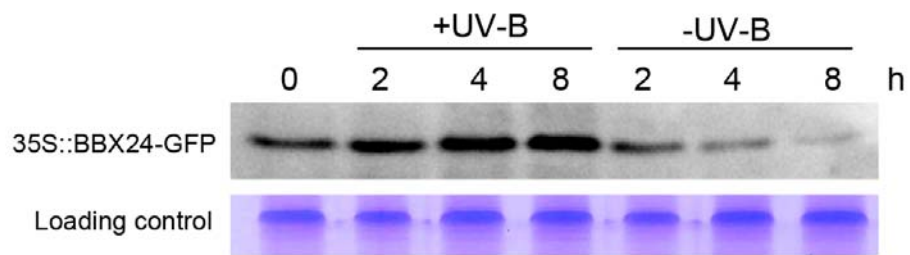

**Supplementary Information, Figure S6** The expression of BBX24 is post-transcriptionally regulated by UV-B.

35S::BBX24-GFP transgenic plants were grown for 7 days under weak light ( $10 \mu\text{mol m}^{-2} \text{s}^{-1}$ ) and then treated with UV-B ( $0.6 \text{ W m}^{-2}$ ) for 10 h (set as time 0), followed by additional + UV-B or – UV-B treatment for the time indicated. BBX24-GFP protein accumulation was detected by protein immunoblotting by using an anti-GFP antibody. Total protein stained with the Coomassie blue G-250 was used as the loading control.
