# Supplementary material
Source: PubMed Central journal article supplement (PMC3367526)
Supplement: cr201234x7.pdf [file cr201234x7.pdf]

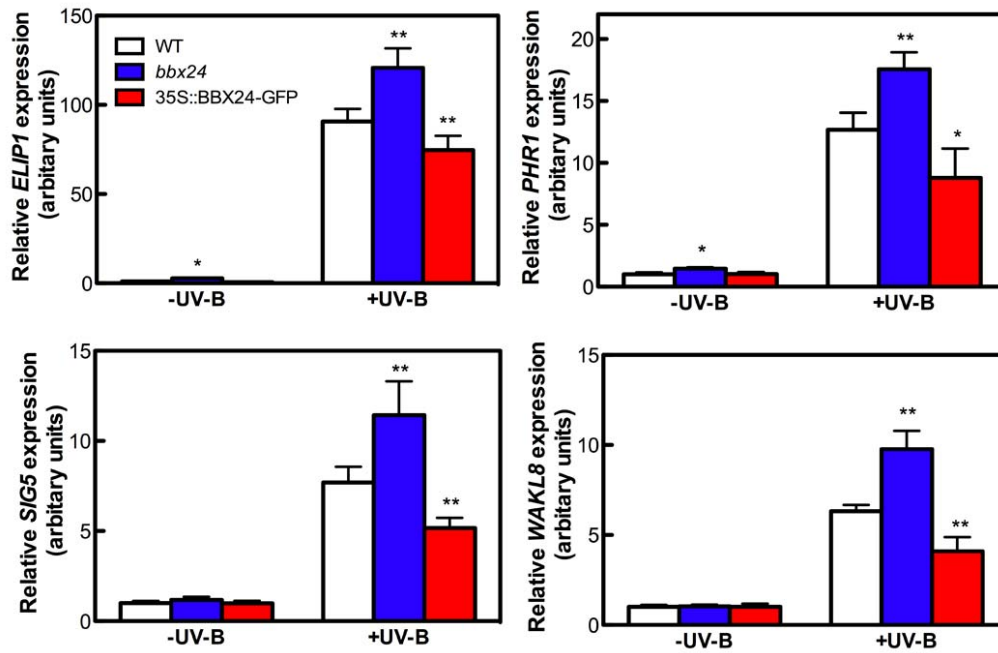

**Supplementary Information, Figure S7** Quantitative RT-PCR analysis of the expression of four UV-B-responsive genes in *bbx24* mutant and a BBX24-GFP overexpression line.

Plants were grown under white light for 5 days, and then transferred to supplementary UV-B radiation ( $0.6 \text{ W m}^{-2}$ ) for 10 h. All the data shown are means ( $\pm$ SEM) of three independent replications. Statistically significant differences of *bbx24* or 35S::BBX24-GFP relative to the wild type control are indicated by a double asterisk ( $P < 0.01$ ) or a single asterisk ( $P < 0.05$ ).
