# Supplementary material
Source: PubMed Central journal article supplement (PMC3367526)
Supplement: cr201234x8.pdf [file cr201234x8.pdf]

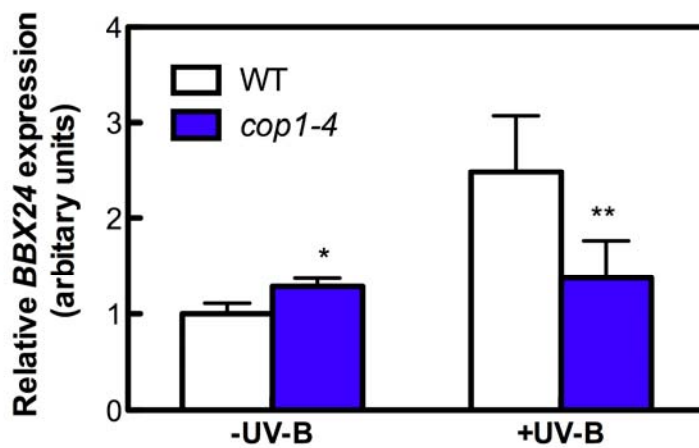

**Supplementary Information, Figure S8** UV-B-induced BBX24 expression is compromised in the *cop1-4* mutant.

Plants were grown under white light for 5 days, and then transferred to supplementary UV-B radiation ( $0.6 \text{ W m}^{-2}$ ) for 2 h. All the data shown are means ( $\pm$ SEM) of three independent replications. Statistically significant difference of *cop1-4* relative to its wild type is indicated by a double asterisk ( $P < 0.01$ ) or a single asterisk ( $P < 0.05$ ).
