# Supplementary material
Source: PubMed Central journal article supplement (PMC3367526)
Supplement: cr201234x9.pdf [file cr201234x9.pdf]

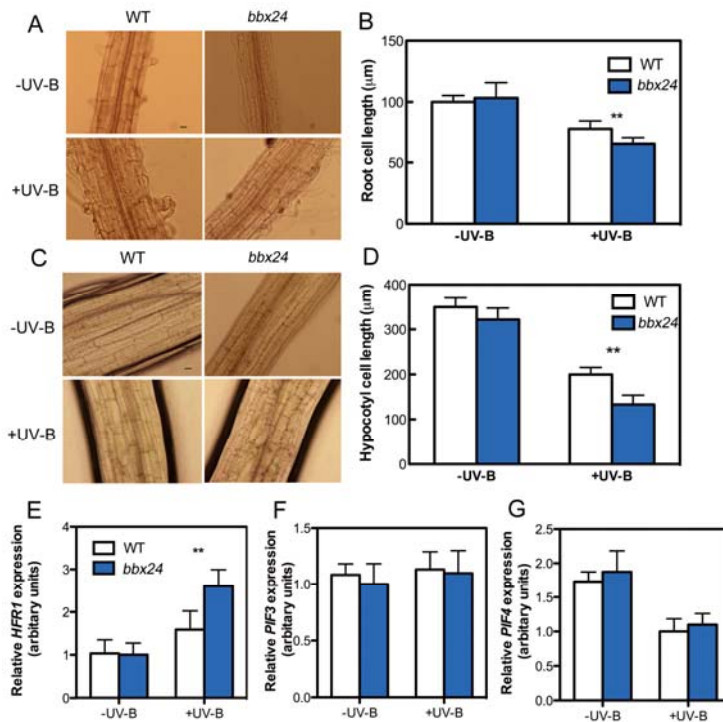

**Supplementary Information, Figure S9** Inhibition of cell elongation is enhanced by UV-B in the root and hypocotyl of *bbx24* mutant.

Wild type and *bbx24* mutant were grown under supplemental UV-B for 5 d (light/dark, 16/8 h). (A) Microscopic visualization of the differentiation zone of roots. (Scale bar: 20 μm.) (B) The average final cell length measured by ImageJ software. (C) The hypocotyl cells observed under microscopy. (Scale bar: 10 μm). (D) The average hypocotyl cell length. (E to G) Relative expression of *HFR1*, *PIF3* and *PIF4* in the wild type and *bbx24* mutant. Wild type and *bbx24* mutants were grown under white light ( $10 \mu\text{mol m}^{-2} \text{s}^{-1}$ ) for 5 days, then transferred to supplementary UV-B radiation ( $0.6 \text{ W m}^{-2}$ ) for 5 h. The mRNA levels of *HFR1* (E), *PIF3* (F) and *PIF4* (G) were quantified by Real-Time Reverse Transcriptase-PCR. The relative expression of transcripts was normalized with respect to *E2F1a* and *eIF4A*. The lowest expression was arbitrarily set as 1. Data shown are means ( $\pm$ SE) of three independent replications.
