# Supplementary material
Source: PubMed Central journal article supplement (PMC3367526)
Supplement: cr201234x10.pdf [file cr201234x10.pdf]

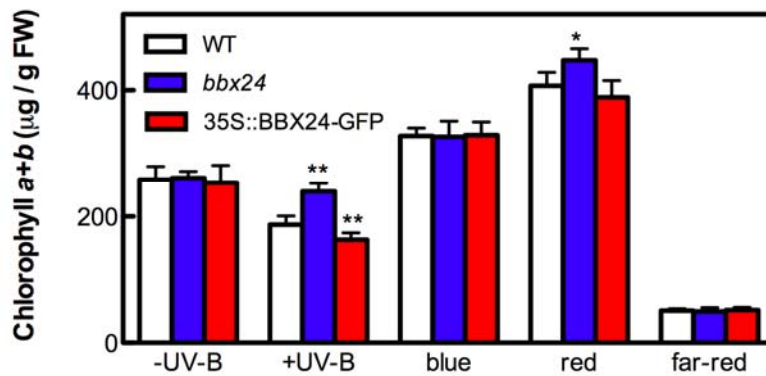

**Supplementary Information, Figure S10** BBX24 is the positive regulator in UV-B induced chlorophyll biosynthesis inhibition.

The total chlorophyll contents of 7-day-old wild type, *bbx24* and 35S::BBX24-GFP grown under continuous UV-B, blue, red and far-red light are determined by spectrophotometer. FW, fresh weight. Data shown are means ( $\pm$ SEM) of three independent replications. Statistically significant differences of *bbx24* or 35S::BBX24-GFP relative to wild type are indicated by a single asterisk ( $P < 0.05$ ) or double asterisk ( $P < 0.01$ ).
