# Supplementary material
Source: PubMed Central journal article supplement (PMC3367526)
Supplement: cr201234x11.pdf [file cr201234x11.pdf]

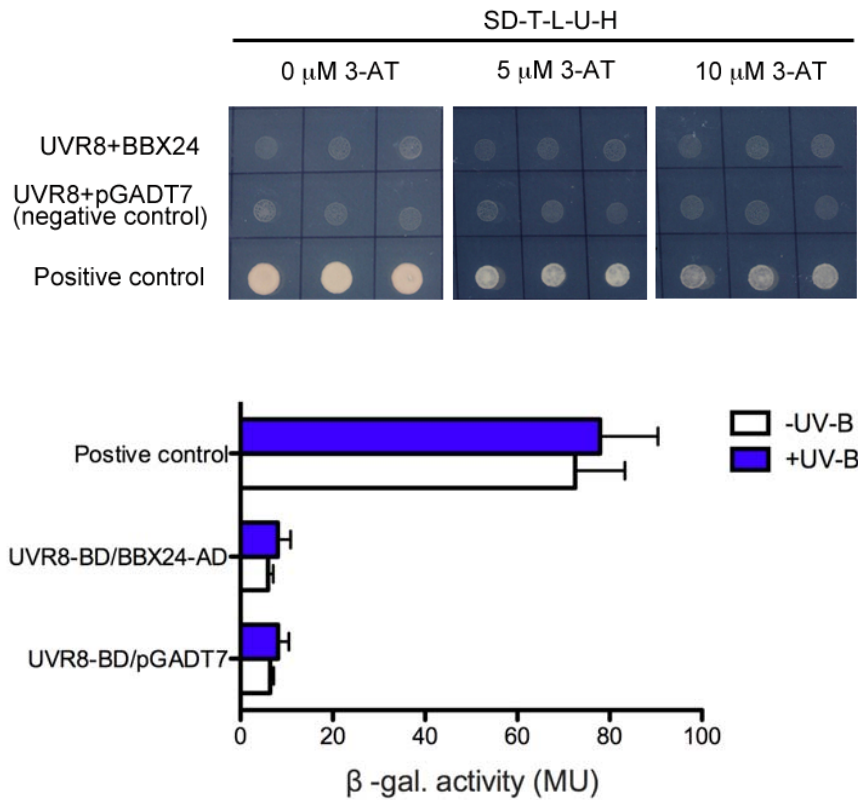

**Supplementary Information, Figure S11** BBX24 does not interact with UVR8 in yeast either with or without UV-B.

Yeast strain AH109 was transformed with a bait and a prey construct. The *BBX24* cDNA was fused to the GAL4-DNA binding domain the bait vector pGBK-T7 and the *UVR8* cDNA was fused with the GAL4-DNA activation domain in the prey vector pGAD-T7. Interaction between the test proteins was determined by selection for growth on quadruple dropouts (SD -Try-Leu-Ura-His) medium.
