# Supplementary material
Source: PubMed Central journal article supplement (PMC3367526)
Supplement: cr201234x12.pdf [file cr201234x12.pdf]

**Supplementary Information, Table S1** Primers used for Real-Time qPCR in this study

| <b>Genes</b>                  | <b>Assession</b> | <b>Primer Pairs</b>                                               |
|-------------------------------|------------------|-------------------------------------------------------------------|
| <i>EF1<math>\alpha</math></i> | At5g60390        | 5'-GGCAGACCGTTGCTGTTGG-3'<br>5'-TCTCATCATTTGGCACCCCTTCTTC-3'      |
| <i>eIF4A</i>                  | At3g13920        | 5'-TCGTGACCCGTGATGATGAGAG-3'<br>5'-CAGAGCAAACACAGCAACAGAAC-3'     |
| <i>UBQ5</i>                   | At3g62250        | 5'-AATGTGAAGGCGAAGATCCAAGAC-3'<br>5'-AGACGGAGGACGAGATGAAGC-3'     |
| <i>BBX24</i>                  | At1g06040        | 5'-TTGCGATATCTGCCAAGAGAAGGC-3'<br>5'-TTCATCGCAGTCCCTGCAAAGC-3'    |
| <i>HY5</i>                    | At5g11260        | 5'-TCAGAACGAGAACCAGATGCTTAG-3'<br>5'-TTAGAACCACCACCACCTCCTC-3'    |
| <i>ELIP1</i>                  | At3g22840        | 5'-GAAGTCACCATCTCCTCCTCCTC-3'<br>5'-CCAACGCCGCAACGAATCC-3'        |
| <i>PHR1</i>                   | At1g12370        | 5'-ATAAAGCCGAAAGCACTCTCTGG-3'<br>5'-CAAGAATGTGTCTACCGCCTGAG-3'    |
| <i>WAKL8</i>                  | At1g16260        | 5'-AATGCTGCCAGATGACTATAACCAC-3'<br>5'-AATTCGGGAGGAGTAAACAAGGAC-3' |
| <i>SIG5</i>                   | At5g24120        | 5'-AGCGGGTATGAGAGGGCTTATC-3'<br>5'-ATGGGACACGAGTGAAGTTTGAAG-3'    |
| <i>CHS</i>                    | At5g13930        | 5'-CTCATGTCGTCTTCTGCACTACCT-3'<br>5'-GAAGCTTGGTGAGCTGGTAGTCA-3'   |
| <i>PIF3</i>                   | At1g09530        | 5'-TCCTCAAAGCCCGCCAAATG-3'<br>5'-CGTAGCAGAAGCAACAGACTCG-3'        |
| <i>PIF4</i>                   | At2g43010        | 5'-TGGCGAGATGGACAAGTGGTTC-3'<br>5'-ATGGTTGAGAAGAAGTGGGAGGAG-3'    |
| <i>HFR1</i>                   | At1g02340        | 5'-AGTAGTGATGATGAATCGGAGGAG-3'<br>5'-TCTCGTCTCTTCTTCTTCTTGG-3'    |
